# Supplementary material for: Self-Assembled Epitaxial Cathode–Electrolyte Nanocomposites for 3D Microbatteries
Source: PubMed Central journal article supplement (PMC9501919; doi:10.1021/acsami.2c09474), 2022-09-06
Supplement: am2c09474_si_001.pdf [file am2c09474_si_001.pdf]

# Supporting Information

## Self-assembled epitaxial cathode-electrolyte nanocomposites for 3D micro-batteries

*Daniel M. Cunha<sup>1</sup>, Nicolas Gauquelin<sup>2</sup>, Rui Xia<sup>1</sup>, Andre ten Elshof, Johan Verbeeck<sup>2</sup>, Mark Huijben<sup>1\*</sup>*

<sup>1</sup> MESA+ Institute for Nanotechnology, University of Twente, 7500 AE Enschede, Netherlands

<sup>2</sup> Electron Microscopy for Materials Science (EMAT), University of Antwerp, 2020, Antwerp, Belgium

### **Corresponding Author**

M. Huijben, [m.huijben@utwente.nl](mailto:m.huijben@utwente.nl)

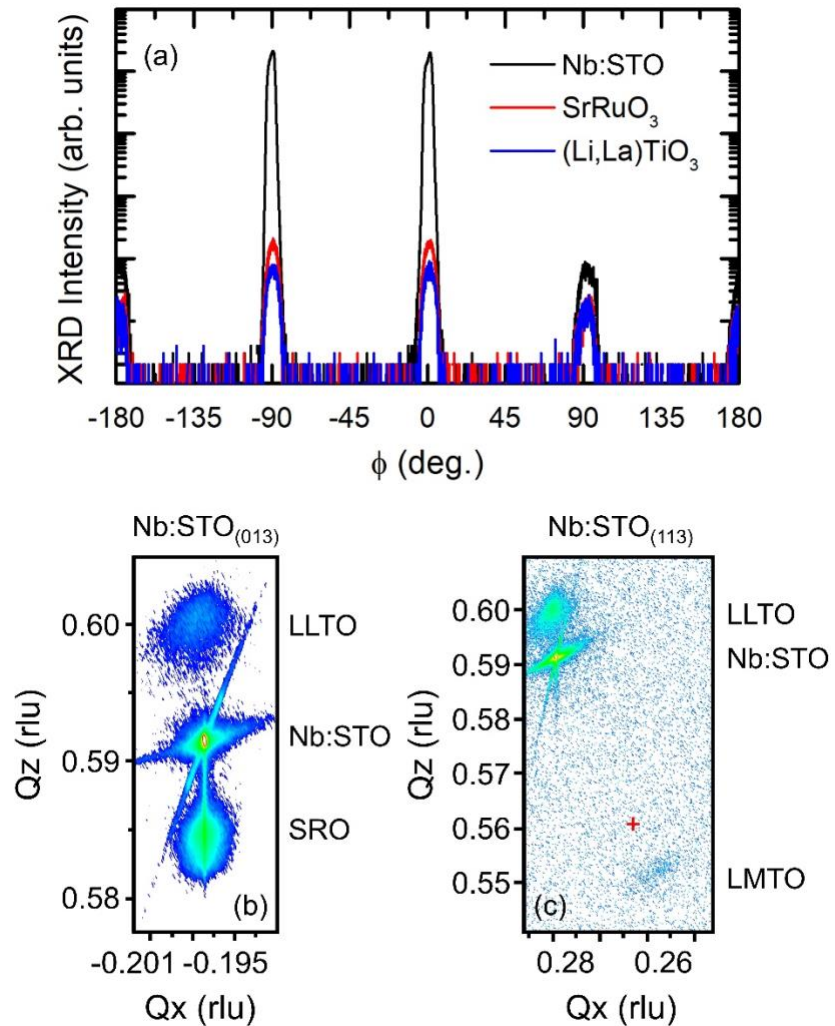

**Figure S1.** (a) In-plane XRD measurements of the LMO-LLTO VAN grown on STO(100), for the (013) plane. Peaks of the Nb:STO, SrRuO<sub>3</sub> and (Li,La)TiO<sub>3</sub> are indicated respectively in black, red and blue. (b) Reciprocal space map graph obtained for the same film at the Nb:STO(013) plane highlighting the LLTO, Nb:STO and SRO peaks. (c) RMS graphs obtained at the STO (113), the red cross indicates the position expected for the relaxed bulk LMO.

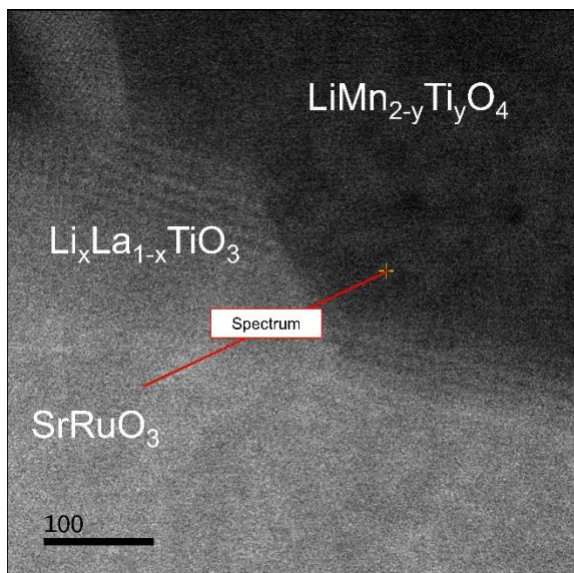

**Figure S2.** EELS analysis for the LMO-LLTO VAN grown on Nb:STO(100) showed in Figure 3d was performed on the profile highlighted in red.

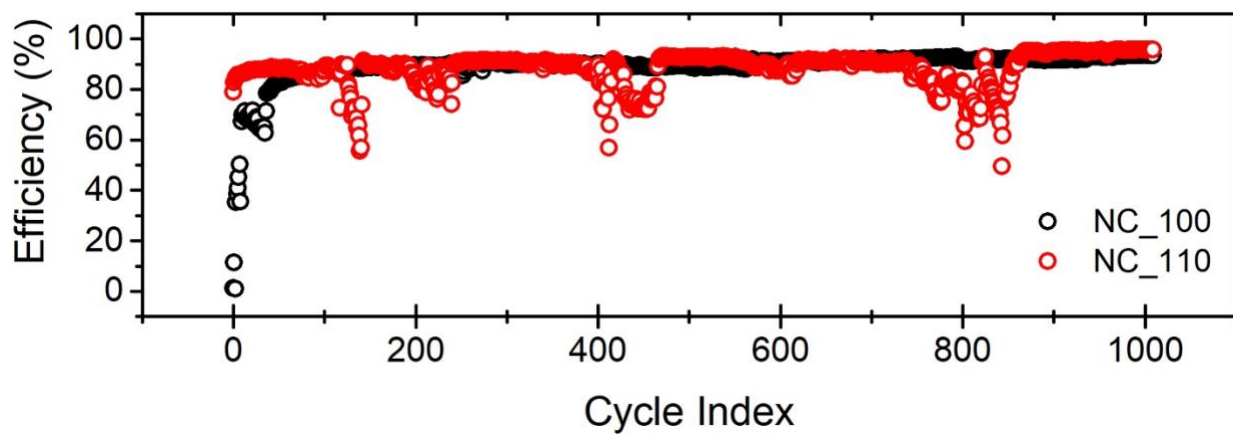

**Figure S3.** Coulombic efficiency given for a thousand cycles for the LMO-LLTO VAN grown on both crystallographic Nb:STO orientations.
